# Supplementary material
Source: Springer Nature journal article supplement (https://www.springermedizin.de/resource/supplementary/12936_2014_3221_MOESM5_ESM.pdf/9545322)
Supplement: MOESM5 [file 9545322]

BK010 TAGGCTTGTGCAGGCAGTGGGCGTGGGGTAAGGCTTCCTGATGCCCCCTGTCCCTGCCCAGAACCTGATGGCCCTCATTAGTCCTTGGCTCTTA**C**CTTGGGAAGCACAGGCGCTGACAGCC 120  
BK036 TAGGCTTGTGCAGGCAGTGGGCGTGGGGTAAGGCTTCCTGATGCCCCCTGTCCCTGCCCAGAACCTGATGGCCCTCATTAGTCCTTGGCTCTTA**C**CTTGGGAAGCACAGGCGCTGACAGCC 120  
BK041 TAGGCTTGTGCAGGCAGTGGGCGTGGGGTAAGGCTTCCTGATGCCCCCTGTCCCTGCCCAGAACCTGATGGCCCTCATTAGTCCTTGGCTCTTA**C**CTTGGGAAGCACAGGCGCTGACAGCC 120  
BK043 TAGGCTTGTGCAGGCAGTGGGCGTGGGGTAAGGCTTCCTGATGCCCCCTGTCCCTGCCCAGAACCTGATGGCCCTCATTAGTCCTTGGCTCTTA**T**CTTGGGAAGCACAGGCGCTGACAGCC 120  
BK050 TAGGCTTGTGCAGGCAGTGGGCGTGGGGTAAGGCTTCCTGATGCCCCCTGTCCCTGCCCAGAACCTGATGGCCCTCATTAGTCCTTGGCTCTTA**T**CTTGGGAAGCACAGGCGCTGACAGCC 120  
BK072 TAGGCTTGTGCAGGCAGTGGGCGTGGGGTAAGGCTTCCTGATGCCCCCTGTCCCTGCCCAGAACCTGATGGCCCTCATTAGTCCTTGGCTCTTA**T**CTTGGGAAGCACAGGCGCTGACAGCC 120  
BK073 -AGGCTTGTGCAGGCAGTGGGCGTGGGGTAAGGCTTCCTGATGCCCCCTGTCCCTGCCCAGAACCTGATGGCCCTCATTAGTCCTTGGCTCTTA**T**CTTGGGAAGCACAGGCGCTGACAGCC 119  
BK075 TAGGCTTGTGCAGGCAGTGGGCGTGGGGTAAGGCTTCCTGATGCCCCCTGTCCCTGCCCAGAACCTGATGGCCCTCATTAGTCCTTGGCTCTTA**C**CTTGGGAAGCACAGGCGCTGACAGCC 120  
BK093 TAGGCTTGTGCAGGCAGTGGGCGTGGGGTAAGGCTTCCTGATGCCCCCTGTCCCTGCCCAGAACCTGATGGCCCTCATTAGTCCTTGGCTCTTA**T**CTTGGGAAGCACAGGCGCTGACAGCC 120  
BK122 TAGGCTTGTGCAGGCAGTGGGCGTGGGGTAAGGCTTCCTGATGCCCCCTGTCCCTGCCCAGAACCTGATGGCCCTCATTAGTCCTTGGCTCTTA**T**CTTGGGAAGCACAGGCGCTGACAGCC 120  
BK267 -AGGCTTGTGCAGGCAGTGGGCGTGGGGTAAGGCTTCCTGATGCCCCCTGTCCCTGCCCAGAACCTGATGGCCCTCATTAGTCCTTGGCTCTTA**C**CTTGGGAAGCACAGGCGCTGACAGCC 119  
BK272 TAGGCTTGTGCAGGCAGTGGGCGTGGGGTAAGGCTTCCTGATGCCCCCTGTCCCTGCCCAGAACCTGATGGCCCTCATTAGTCCTTGGCTCTTA**C**CTTGGGAAGCACAGGCGCTGACAGCC 120  
**Duffy** -**AGGCTTGTGCAGGCAGTGGGCGTGGGGTAAGGCTTCCTGATGCCCCCTGTCCCTGCCCAGAACCTGATGGCCCTCATTAGTCCTTGGCTCTTA**T**CTTGGGAAGCACAGGCGCTGACAGCC 119**

\*\*\*\*\*
